# Supplementary material for: One-step synthesis of metallic and metal oxidenanoparticles using amino-PEG oligomers as multi-purpose ligands: size and shape control, and quasi-universal solvent dispersibility
Source: Royal Society of Chemistry journal article supplement (doi:10.1039/c0cc02615h), 2010-11-27
Supplement: c0cc02615h.pdf [file c0cc02615h.pdf]

## SUPPLEMENTARY MATERIALS

### **One-step synthesis of metallic and metal oxide nanoparticles using amino-PEG oligomers as multi-purposes ligands: size and shape control, and quasi-universal solvent dispersability.**

Javier Rubio-Garcia,<sup>a,b,c</sup> Yannick Coppel,<sup>a,b</sup> Pierre Lecante,<sup>d</sup> Christophe Mingotaud,<sup>c</sup> Bruno Chaudret<sup>a,b</sup>, Fabienne Gauffre,<sup>c\*</sup> and Myrtil L. Kahn,<sup>a,b\*</sup>

#### Figure captions:

**S1 :** WAXS (left) and Fourier Transform (right) of (a): ZnO NPs synthesized in presence of bis-propylamine-PEG1500 oligomer ( $\rho_{\text{lig}} = 0.5$  and  $1.0$ ); (b): Ru NPs synthesized in presence of bis-propylamine-PEG1500 oligomer; (c) and (d): Pd and Pt NPs respectively synthesized in presence of a mixture of ethylamine-PEG750 and carboxymethyl-PEG3000. Reference diffractograms from bulk phases are displayed below the ones of NPs.

**S2:** NMR spectra of (I-a): mixture of ethylamine-PEG750 and carboxymethyl-PEG3000 oligomers in absence of NPs; (I-b): in presence of Pd NPs; (I-c): in presence of Pt NPs. (II-a): ethylamine-PEG750 oligomer in absence of NPs; (II-b): in presence of Ru NPs; (III-a): ethylamine-PEG750 oligomer in absence of NPs; (III-b): in presence of ZnO NPs ( $\rho_{\text{lig}} = 2$ ); (III-c): in presence of ZnO NPs ( $\rho_{\text{lig}} = 1$ ).

**S3:** (a) Emission and (b) excitation spectra for ZnO nanoparticles ( $\rho_{\text{lig}} = 1$  bis-propylamine-PEG1500) dispersed into THF; (c) Pictures of the same ZnO nanoparticles, dispersed in water under illumination with (left)  $\lambda = 320$  nm or (right)  $\lambda = 380$  nm.

**S4:** Amount of ligand (bis-propylamine-PEG1500 oligomer) used in the synthesis and the corresponding size of the ZnO NPs. <sup>(a)</sup> mean diameter and standard deviation.

**S5:** Organometallic synthesis of metallic NPs using bis-propylamine-PEG1500 molecule ( $n \sim 30$ ) or ethylamine-PEG750 molecule ( $n \sim 15$ ).

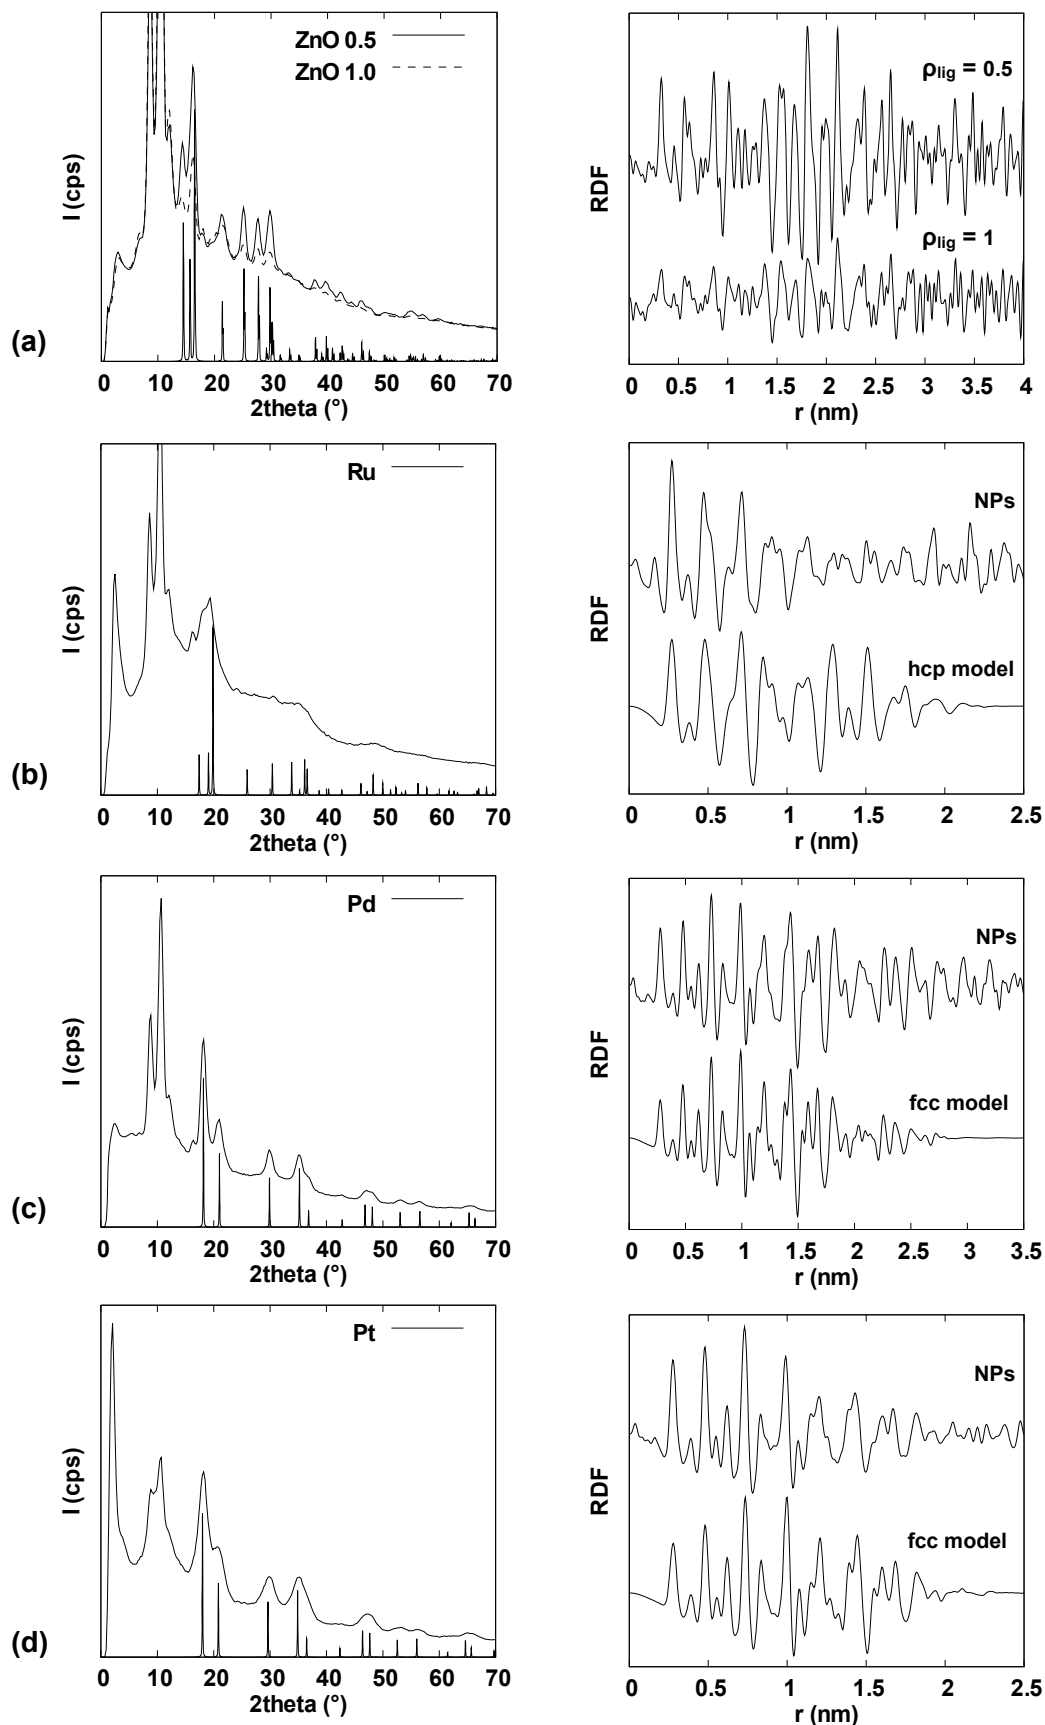

**S1** : WAXS (left) and Fourier Transform (right) of (a): ZnO NPs synthesized in presence of bis-propylamine-PEG1500 oligomer ( $\rho_{\text{lig}} = 0.5$  and  $1.0$ ); (b): Ru NPs synthesized in presence of bis-propylamine-PEG1500 oligomer; (c) and (d): Pd and Pt NPs respectively synthesized in presence of a mixture of ethylamine-PEG750 and carboxymethyl-PEG3000. Reference diffractograms from bulk phases are displayed below the ones of NPs.

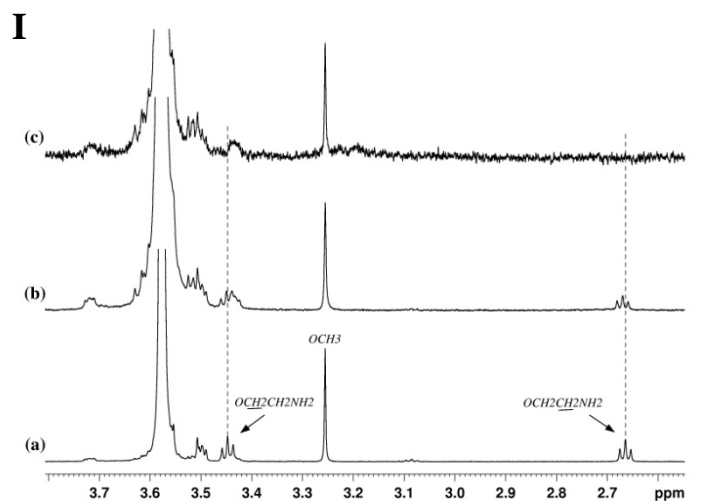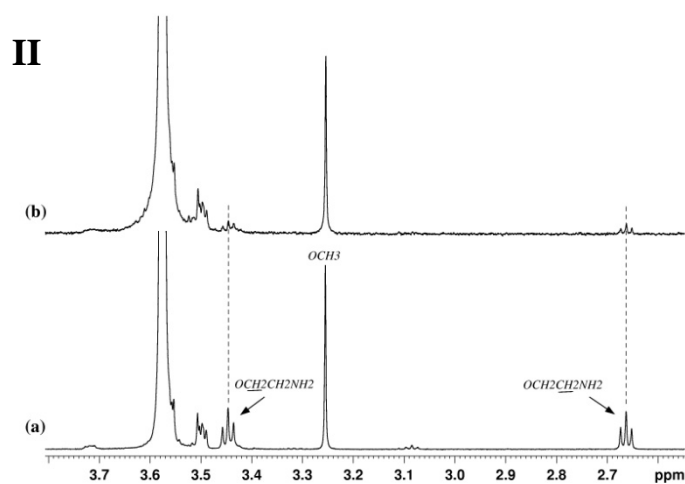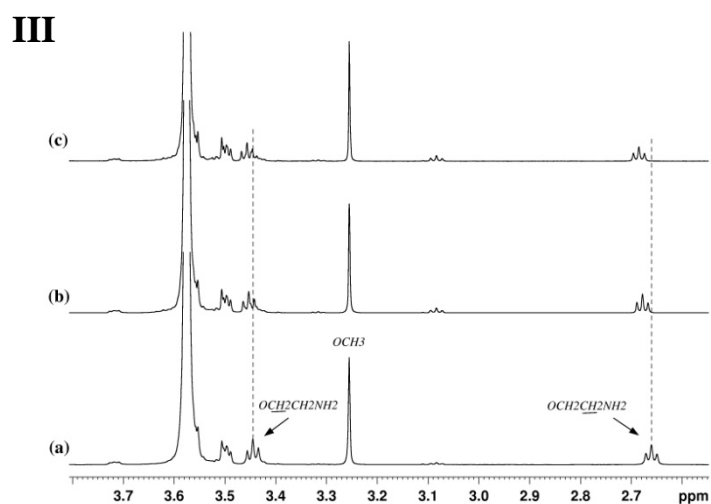

**S2:** NMR spectra of (I-a): mixture of ethylamine-PEG750 and carboxymethyl-PEG3000 oligomers in absence of NPs; (I-b): in presence of Pd NPs; (I-c): in presence of Pt NPs. (II-a): ethylamine-PEG750 oligomer in absence of NPs; (II-b): in presence of Ru NPs; (III-a): ethylamine-PEG750 oligomer in absence of NPs; (III-b): in presence of ZnO NPs ( $\rho_{\text{lig}} = 2$ ); (III-c): in presence of ZnO NPs ( $\rho_{\text{lig}} = 1$ ).

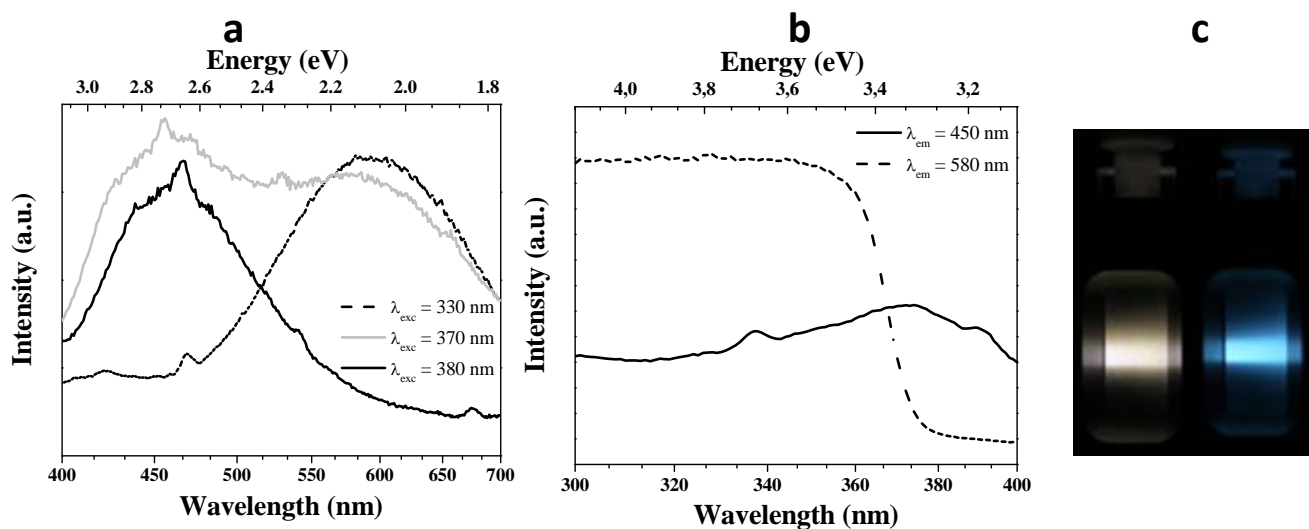

**S3:** (a) Emission and (b) excitation spectra for ZnO nanoparticles ( $\rho_{\text{lig}} = 1$  bis-propylamine-PEG1500) dispersed into THF; (c) Pictures of the same ZnO nanoparticles, dispersed in water under illumination with (left)  $\lambda = 320$  nm or (right)  $\lambda = 380$  nm.

| Amount of ligand           | diameter <sup>a</sup> (nm) |
|----------------------------|----------------------------|
| $\rho_{\text{lig}} = 0.05$ | $7.2 \pm 2.3$              |
| $\rho_{\text{lig}} = 0.1$  | $5.2 \pm 1.6$              |
| $\rho_{\text{lig}} = 0.5$  | $4.9 \pm 0.9$              |
| $\rho_{\text{lig}} = 1$    | $4.0 \pm 1.0$              |
| $\rho_{\text{lig}} = 2$    | $3.9 \pm 0.8$              |

**S4:** Amount of ligand (bis-propylamine-PEG1500 oligomer) used in the synthesis and the corresponding size of the ZnO NPs. <sup>(a)</sup> mean diameter and standard deviation.

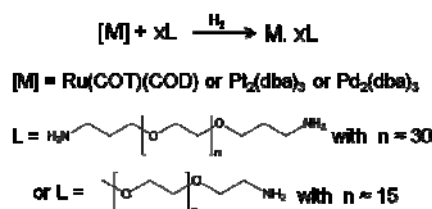

**S5:** Organometallic synthesis of metallic NPs using bis-propylamine-PEG1500 molecule ( $n \sim 30$ ) or ethylamine-PEG750 molecule ( $n \sim 15$ ).
